# Supplementary material for: Microwave assisted isomerization of alkenyl aromatics over solid base catalysts: an understanding through theoretical study
Source: Royal Society of Chemistry journal article supplement (doi:10.1039/c2ra20179h), 2012-01-01

## Electronic Supplementary Information

### **Microwave assisted isomerization of alkenyl aromatics over solid base catalysts: An understanding through theoretical study**

C.M. Jinesh<sup>a</sup>, Anik Sen<sup>b</sup>, Bishwajit Ganguly<sup>b\*</sup> and S. Kannan<sup>a\*</sup>

*<sup>a</sup>Discipline of Inorganic Materials & Catalysis, Central Salt and Marine Chemicals Research Institute, Council of Scientific and Industrial Research (CSIR), GB Marg, Bhavnagar - 364 002, India. FAX: +91-278-2567562, Tel: +91-278-2567760 Ext.703,  
E-mail: [skannan@csmcri.org](mailto:skannan@csmcri.org) ; [kanhem1@yahoo.com](mailto:kanhem1@yahoo.com)*

*<sup>b</sup>Analytical Science Discipline, Central Salt and Marine Chemicals Research Institute, Council of Scientific and Industrial Research (CSIR), GB Marg, Bhavnagar - 364 002, India,  
Tel: +91-278-2567760 Ext. 677,  
E-mail: [ganguly@csmcri.org](mailto:ganguly@csmcri.org)*

**Figure S1.** FT-IR spectra of: (a) NiAl<sub>2</sub>, (b) NiAl<sub>3</sub>, (c) NiAl<sub>4</sub>, (d) MgAl<sub>2</sub>, (e) MgAl<sub>3</sub>, (f) MgAl<sub>4</sub>

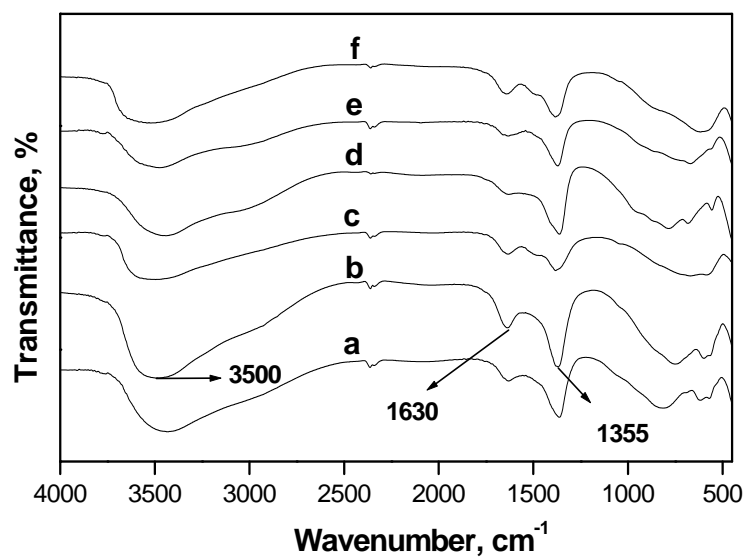

**Figure S2.** TG-DTG curves of: (a) NiAl<sub>2</sub>, (b) NiAl<sub>3</sub>, (c) NiAl<sub>4</sub>, (d) MgAl<sub>2</sub>, (e) MgAl<sub>3</sub>, (f) MgAl<sub>4</sub>

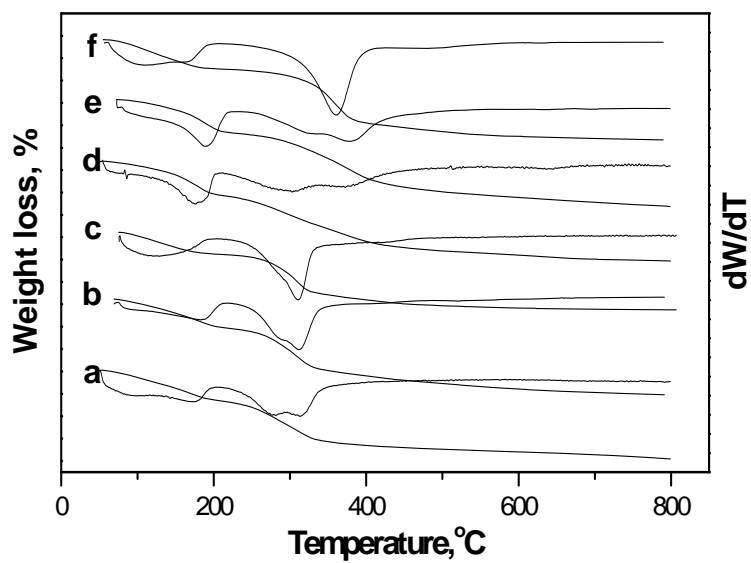

Supplement: c2ra20179h.pdf [file c2ra20179h.pdf]
